# Supplementary material for: Transcriptional Regulation of Siglec-15 by ETS-1 and ETS-2 in Hepatocellular Carcinoma Cells
Source: MDPI journal article supplement (doi:10.3390/ijms24010792), 2023-01-02
Supplement: s1 [file s1]

**Table S1.** The sequences of primers used for PCR amplification, qRT-PCR and EMSA

| primer               | sequence                                                                                                                               |
|----------------------|----------------------------------------------------------------------------------------------------------------------------------------|
| -1800nt~+55nt        | F: cctgagctcgctagcctcgagTATGGGATGCCAAGTGGCG                                                                                            |
| -1540nt~+55nt        | F: cctgagctcgctagcctcgagGACAGTAGACCAGCCTCTGGGC                                                                                         |
| -1270nt~+55nt        | F: cctgagctcgctagcctcgagACCGTGTTAGCCAAGATGGTCT                                                                                         |
| -942nt~+55nt         | F: cctgagctcgctagcctcgagTAGCTCAGCTTTCCTAGAAGGATAATG                                                                                    |
| -735nt~+55nt         | F: cctgagctcgctagcctcgagCCAAGTGCCAAGGGAAGGG                                                                                            |
| -453nt~+55nt         | F: cctgagctcgctagcctcgagGAGAGGGAGGGAGGAATAAGGG                                                                                         |
| -231nt~+55nt         | F: cctgagctcgctagcctcgagTCTTTCTCACCCCTCTTTCCTGTTT                                                                                      |
| -21nt~+55nt          | F: cctgagctcgctagcctcgagCCACGCCTGGGAGGGCCC                                                                                             |
| -1800nt~+55nt        | R: cagtaccggattgccaagcttTGCTGTGAGCATCTGAACACCC                                                                                         |
| pcDNA3.1-ETS-1-Flag: | F: gggagaccaagctggctagc ATGAAGGCGGCCGTCGATCTCAA<br>R: tccgagctcggtaccaagcttTCACTTGTCGTCATCGTCTTTGTAGT<br>CCTCGTCGGCATCTGGCTTG          |
| pcDNA3.1-ETS-2-Flag: | F: gggagaccaagctggctagcATGAATGATTTTCGGAATCAAGAATA<br>TGGACC<br>R: tccgagctcggtaccaagcttTCACTTGTCGTCATCGTCTTTGTAGT<br>CGTCCTCCGTGTCGGGC |
| Siglec-15- qRT-PCR   | F: TTTGAGCCAGATGAACCC CC<br>R: CAGGGAGCTCCGAAATG GTT                                                                                   |
| GAPDH- qRT-PCR       | F: GGTGTGAACCATGAGAAGTATGA<br>R: GAGTCCTTCCACGATACCAAAG                                                                                |
| ETS-1- qRT-PCR       | F: ACGTGTACCGCTTTGTGTGT<br>R: TCGTCGGCATCTGGCTTG                                                                                       |
| ETS-2- qRT-PCR       | F: CTCTGGGCCACCAATGAGTT<br>R: TCACCCACAAAGTCAGGTGC                                                                                     |
| Cold EBS1 probe      | F: GGAGGGAGAAAGGGAGGAAGAGAGG<br>R: CCTCTCTTCC TCCCTTTCTC CCTCC                                                                         |
| Biotin EBS1 probe    | F: GGAGGGAGAAAGGGAGGAAGAGAGG<br>R: CCTCTCTTCC TCCCTTTCTC CCTCC                                                                         |
| Mutated EBS1 probe   | F: GGAGGGAGAAAG <u>AAAAA</u> AAGAGAGG<br>R: CCTCTCTTTT TTTCTTTCTC CCTCC                                                                |
| Cold EBS2 probe      | F: AGGAAGAGAGGAAGGAAGGAA<br>R: TTCCTTCCTT CCTCTCTTCC                                                                                   |
| Biotin EBS2 probe    | F: AGGAAGAGAGGAAGGAAGGAA<br>R: TTCCTTCCTT CCTCTCTTCC T                                                                                 |
| Mutated EBS2 probe   | F: AGGAAGA <u>AAAAAAAAA</u> AAGGAA                                                                                                     |

---

|                                    |                                                |
|------------------------------------|------------------------------------------------|
|                                    | R: TTCCTTTTTT TTTTCTTCC T                      |
| Cold EBS3 probe                    | F: AAGGAAAGGAAGGAGGGAGGGAGA                    |
|                                    | R: TCTCCCTCCC TCCTTCCTTT CCTT                  |
| Biotin EBS3 probe                  | F: AAGGAAAGGAAGGAGGGAGGGAGA                    |
|                                    | R: TCTCCCTCCC TCCTTCCTTT CCTT                  |
| Mutated EBS3 probe                 | F: AA <u>AAAAAAAA</u> AAGAGGGAGGGAGA           |
|                                    | R: TCTCCCTCCC TCTTTTTTTT TTTT                  |
| Cold EBS4 probe                    | F: GAGGGAGGGAGAGGAAGGAAGTGAGGGAGGGA            |
|                                    | R: TCCCTCCCTC ACTTCCTTCC TCTCCCTCCC TC         |
| Biotin EBS4 probe                  | F: GAGGGAGGGAGAGGAAGGAAGTGAGGGAGGGA            |
|                                    | R: TCCCTCCCTC ACTTCCTTCC TCTCCCTCCC TC         |
| Mutated EBS4 probe                 | F: GAGGGAGGGAG <u>AAAAAAAA</u> AGTGAGGGAGGGA   |
|                                    | R: TCCCTCCCTCACTTTTTTTTTCTCCCTCCCTC            |
| Cold EBS5 probe                    | F: GAGGGAGGGAGGAAGGAAGGGTGAGCCACAT             |
|                                    | R: ATGTGGCTCA CCCTTCCTTC CTCCCTCCCT C          |
| Biotin EBS5 probe                  | F: GAGGGAGGGAGGAAGGAAGGGTGAGCCACAT             |
|                                    | R: ATGTGGCTCA CCCTTCCTTC CTCCCTCCCT C          |
| Mutated EBS5 probe                 | F: GAGGGAGGGAGGA <u>AAAAAAG</u> GTGAGCCACAT    |
|                                    | R: ATGTGGCTCA CCTTTTTTTC CTCCCTCCCT C          |
| Cold EBS6 probe                    | F: GATGGCAGCCACAGGAAATGGCCCTGTT                |
|                                    | R: AACAGGGCCA TTTCCTGTGG CTGCCATC              |
| Biotin EBS6 probe                  | F: GATGGCAGCCACAGGAAATGGCCCTGTT                |
|                                    | R: AACAGGGCCA TTTCCTGTGG CTGCCATC              |
| Mutated EBS6 probe                 | F: GATGGCAGC <u>CAGAAA</u> AAATGGCCCTGTT       |
|                                    | R: AACAGGGCCA TTTTCTGTGG CTGCCATC              |
| TGF- $\beta$ 1-Cold EBS-1-2 probe  | F: CTTTCTCACCCTCTTTCCTGTTTCCTGTCCTGGA          |
|                                    | R: TCCAGGACAGGAAACAGGAA AGAGGGTGAG AAAG        |
| TGF- $\beta$ 1-BiotinEBS-1-2probe  | F: CTTTCTCACCCTCTTTCCTGTTTCCTGTCCTGGA          |
|                                    | R: TCCAGGACAGGAAACAGGAA AGAGGGTGAG AAAG        |
| TGF- $\beta$ 1-MutatedEBS-1-2probe | F: CTTTCTCACCCTCT <u>AAGGTA</u> TTTAAGGTCCTGGA |
|                                    | R: TCCAGGACCT TAAATACCTT AGAGGGTGAG AAAG       |
| TGF- $\beta$ 1-Cold EBS3 probe     | F: GGCTGCCAGGCTTCCTGTCCCCAGTTC                 |
|                                    | R: GAACTGGGGACAGGAAGCCTGGCAGCC                 |
| TGF- $\beta$ 1-Biotin EBS3 probe   | F: GGCTGCCAGGCTTCCTGTCCCCAGTTC                 |
|                                    | R: GAACTGGGGATACCAACCCTGGCAGCC                 |
| TGF- $\beta$ 1-Mutated EBS3 probe  | F: GGCTGCCAGG <u>GTTGGTA</u> TCCCCAGTTC        |
|                                    | R: GAACTGGGGACAGGAAGCCTGGCAGCC                 |
| TGF- $\beta$ 1-Cold EBS4 probe     | F: CCTGTCCCCAGTTCCTCCGGCTCCCGCAGA              |
|                                    | R: TCTGCGGGAGCCGAGGAACTGGGGACAGG               |

---

|                                   |                                                                                     |
|-----------------------------------|-------------------------------------------------------------------------------------|
| TGF- $\beta$ 1-Biotin EBS4 probe  | F: CCTGTCCCCAGTTCCTCCGGCTCCCGCAGA<br>R: TCTGCGGGAGCCGGAGGAAGTGGGGACAGG              |
| TGF- $\beta$ 1-Mutated EBS4 probe | F: CCTGTCCCCA <del>GTTTAT</del> CCGGCTCCCGCAGA<br>R: TCTGCGGGAGCCGGATAAACTGGGGACAGG |
| TGF- $\beta$ 1-Cold EBS5 probe    | F: CCGCCCGCCTTCCTTCCCCCACCACGC<br>R: GCGTGGTGGGGGAAGGAAGGCGGGCGG                    |
| TGF- $\beta$ 1-Biotin EBS5 probe  | F: CCGCCCGCCTTCCTTCCCCCACCACGC<br>R: GCGTGGTGGGGGAAGGAAGGCGGGCGG                    |
| TGF- $\beta$ 1-Mutated EBS5 probe | F: CCGCCCGC <del>GAAGG</del> TCCCCCACCACGC<br>R: GCGTGGTGGGGGAACCTTCGCGGGCGG        |

**Table S2.** The sequences of siRNAs used for qRT-PCR, Western blot and Dual-luciferase reporter assay

| siRNA   | sequence                                                   |
|---------|------------------------------------------------------------|
| ETS-1-2 | F: GCACCUUCAAGG-ACUAUGUTT<br>R: ACAUAGUCCUUGAAGGUGCTT      |
| ETS-1-3 | F: GCAGUUUCUUCUGGAAUUATT<br>R: UAAUCCAGAAGAAACUGCTT        |
| ETS-2-1 | F: AGAAAUGGAAUCCAAGCCUGUUGG<br>R: CCAACAGGCUUGGAUCCAUUUCU  |
| ETS-2-2 | F: GCCAACAGGCUUGGAUCCAUUUCU<br>R: AGAAAUGGAAUCCAAGCCUGUUGG |

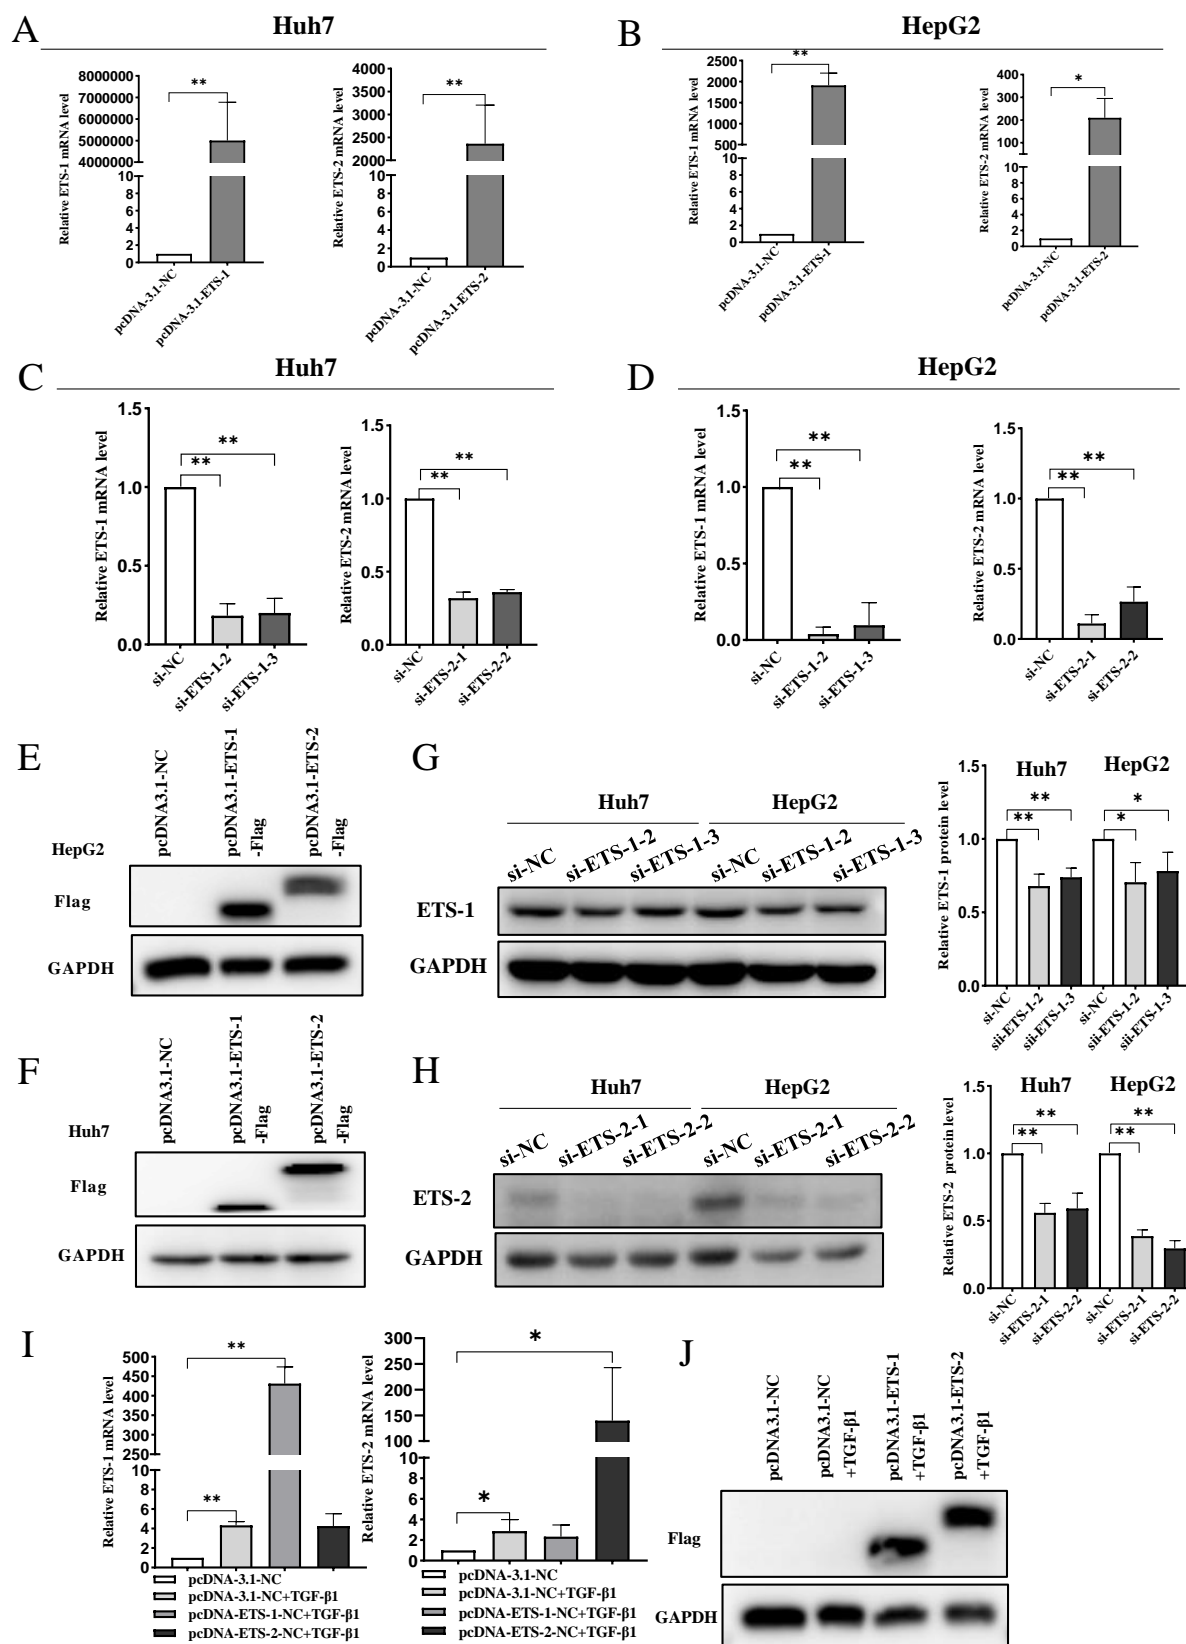

Supplementary Figure S1

**Figure S1.** (A-H) The specificity and efficiency of ETS-1 and ETS-2 overexpression or knockdown at mRNA (A-D) and protein (E-H) levels was confirmed in HepG2 and Huh7 cells by qRT-PCR and Western blot analysis, respectively. (I-J) The specificity and efficiency of ETS-1 and ETS-2 overexpression at mRNA (I) and protein (J) levels was confirmed in HepG2 cells by qRT-PCR and Western blot analysis, respectively. \*  $p < 0.05$  and \*\*  $p < 0.01$ .
